# Supplementary material for: Gastrointestinal Adenocarcinomas of the Esophagus, Stomach, and Colon Exhibit Distinct Patterns of Genome Instability and Oncogenesis
Source: Oxford University Press journal article supplement (doi:10.1158/0008-5472.can-11-3893), 2012-07-03

Figure S1

Amplifications

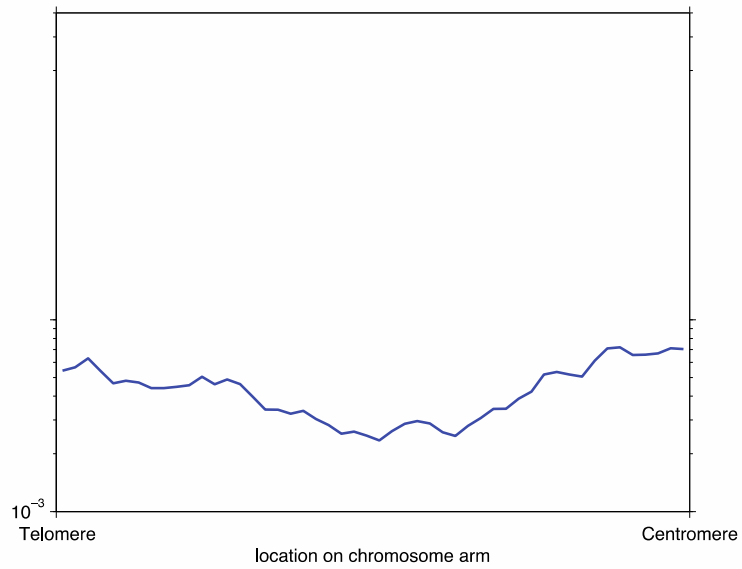

6  
4  
1  
1

Deletions

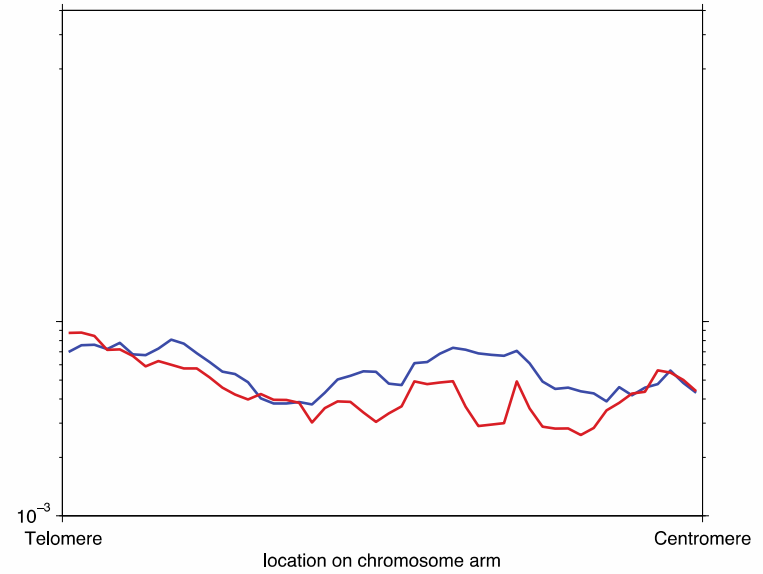

3  
)  
7  
;

|              |     |              |     |              |     |              |     |
|--------------|-----|--------------|-----|--------------|-----|--------------|-----|
| Colorectal   | —   | Gastric      | —   | Esophageal   | —   | Composite    | ... |
| Colorectal   | - - | Gastric      | - - | Esophageal   | - - | Composite    | - - |
| Significance |     | Significance |     | Significance |     | Significance |     |

Figure S2-A

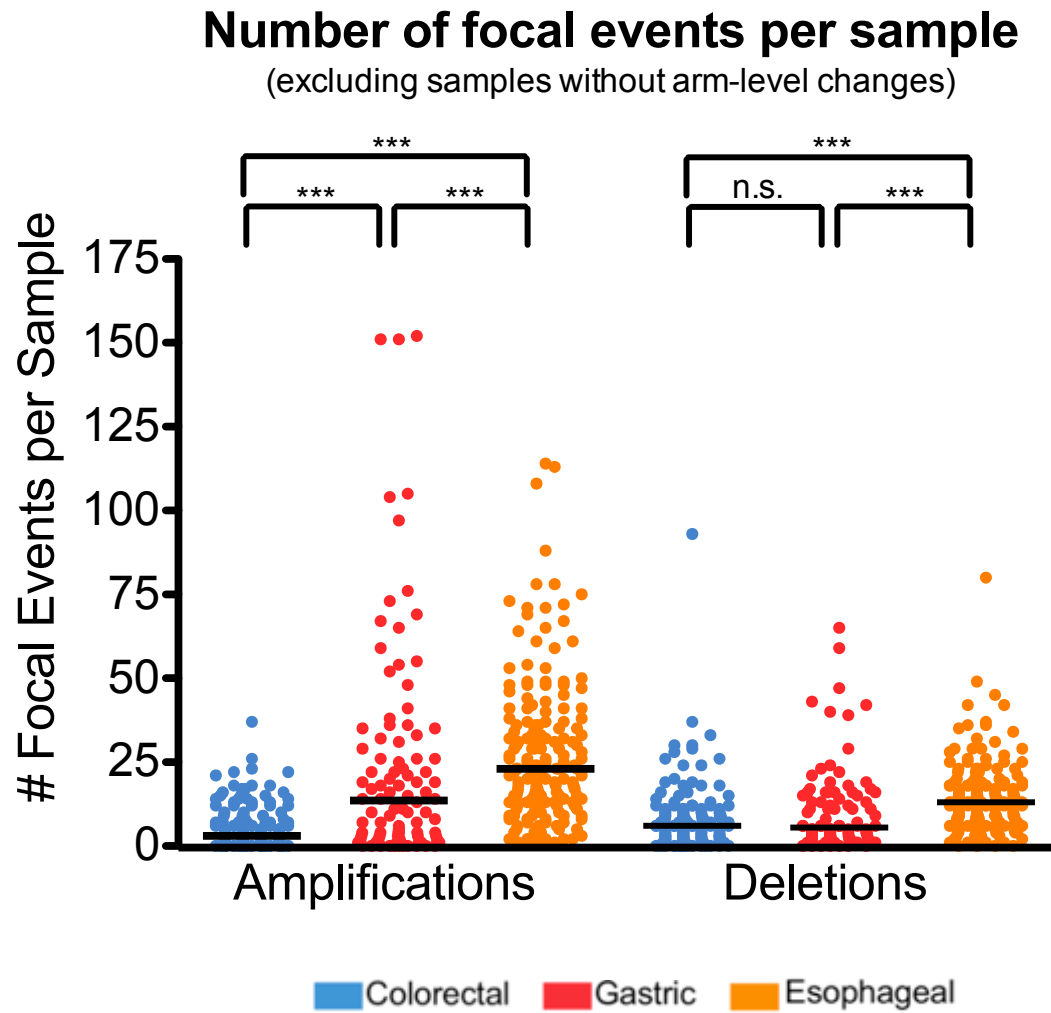

Figure S2-B

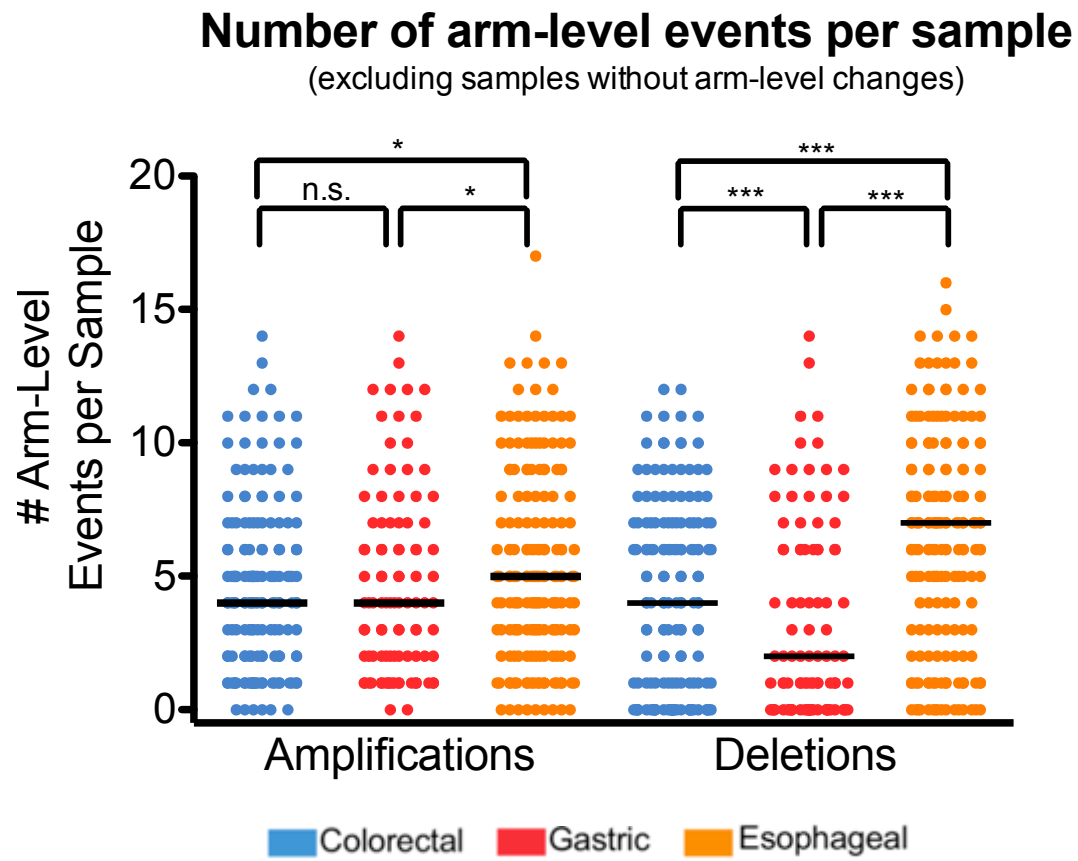

Figure S3

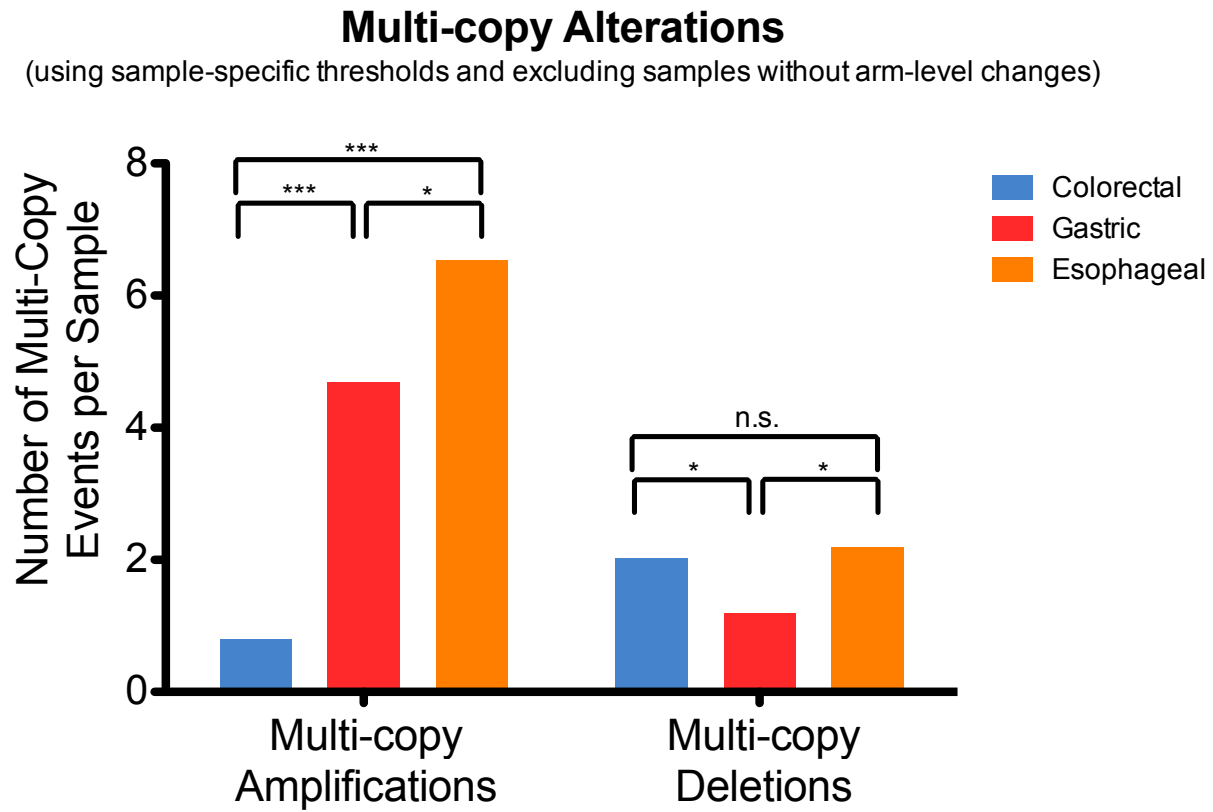

Figure S4-A

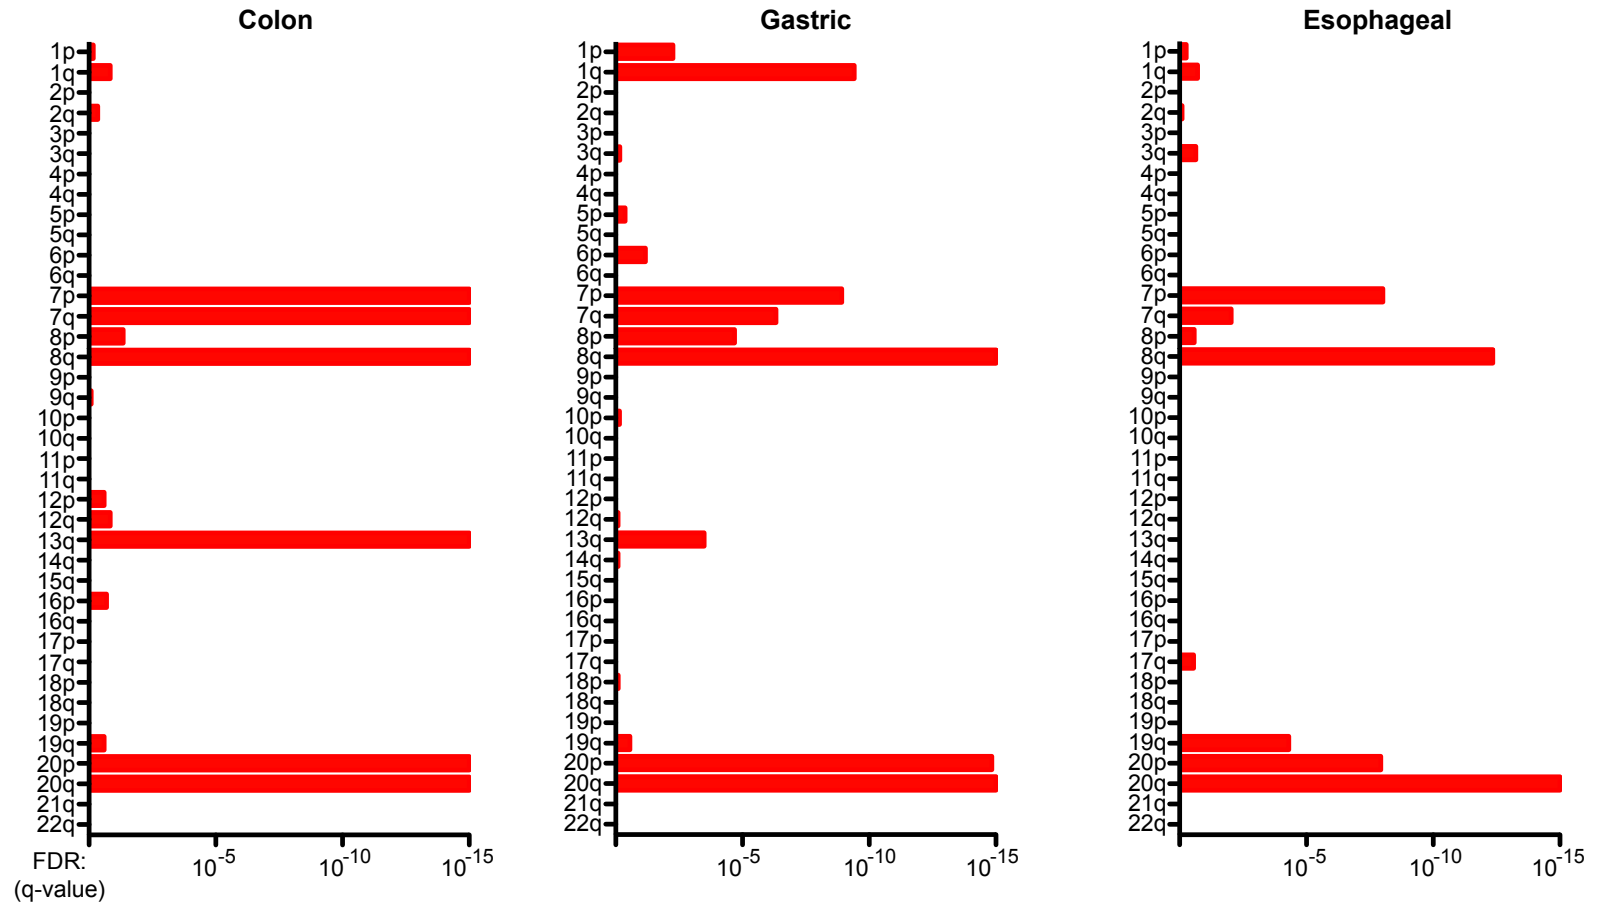

Figure S4-B

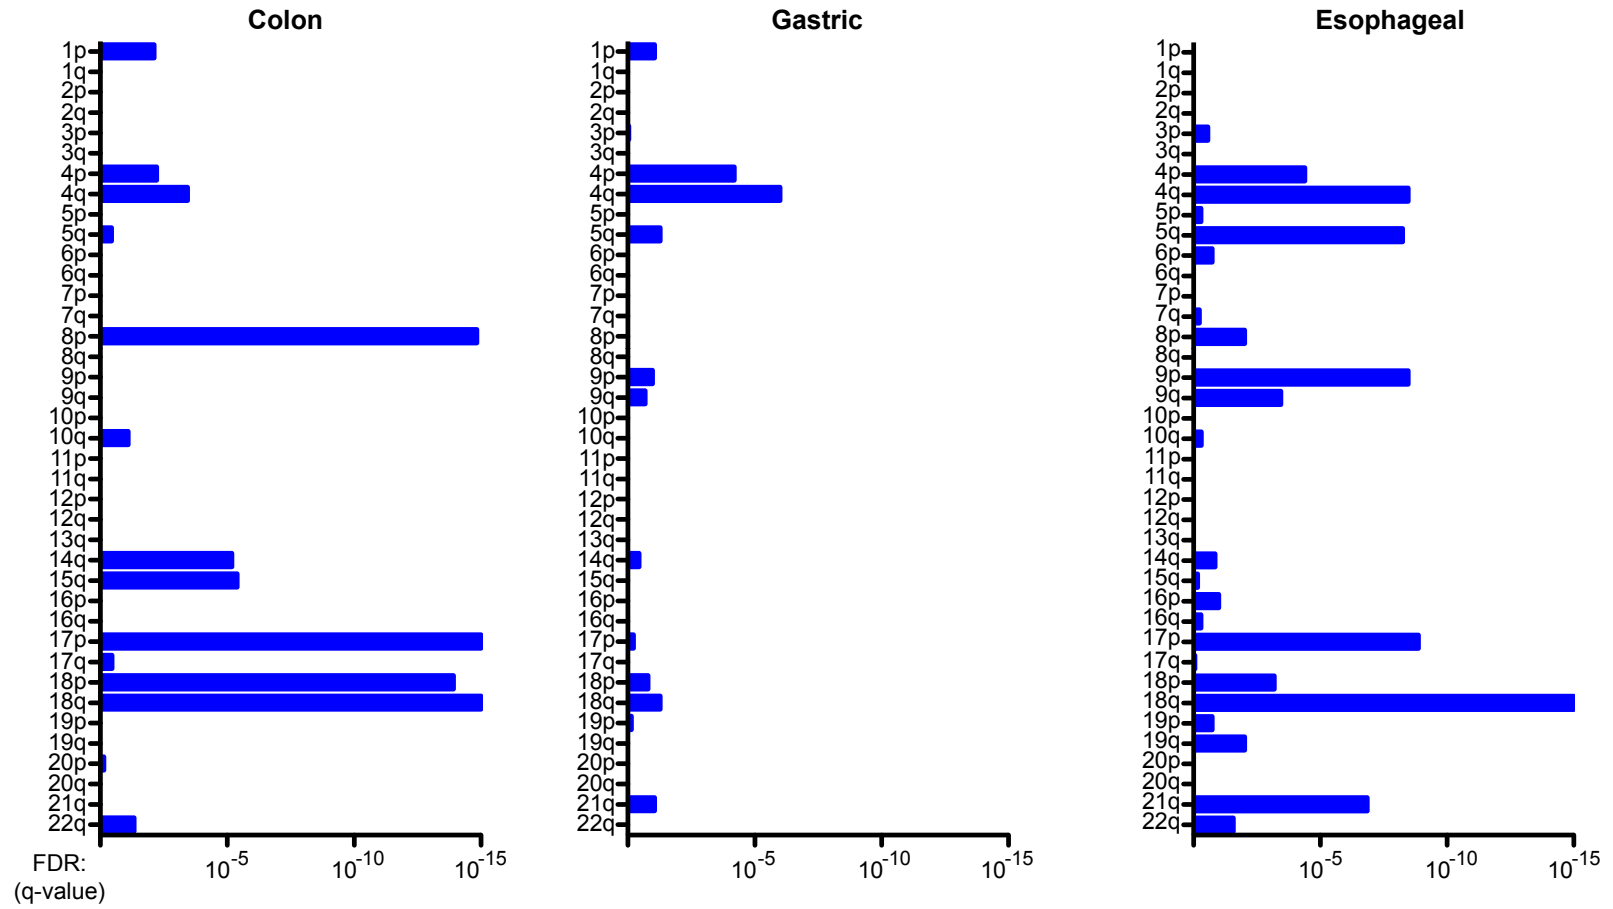

Figure S5-A

## Colorectal Carcinoma

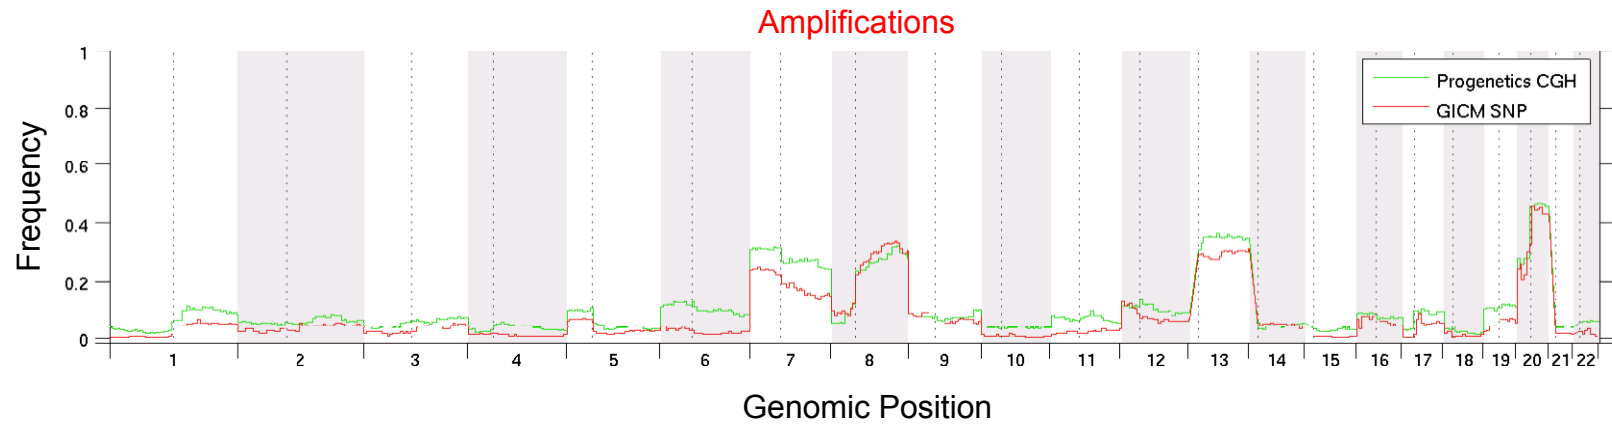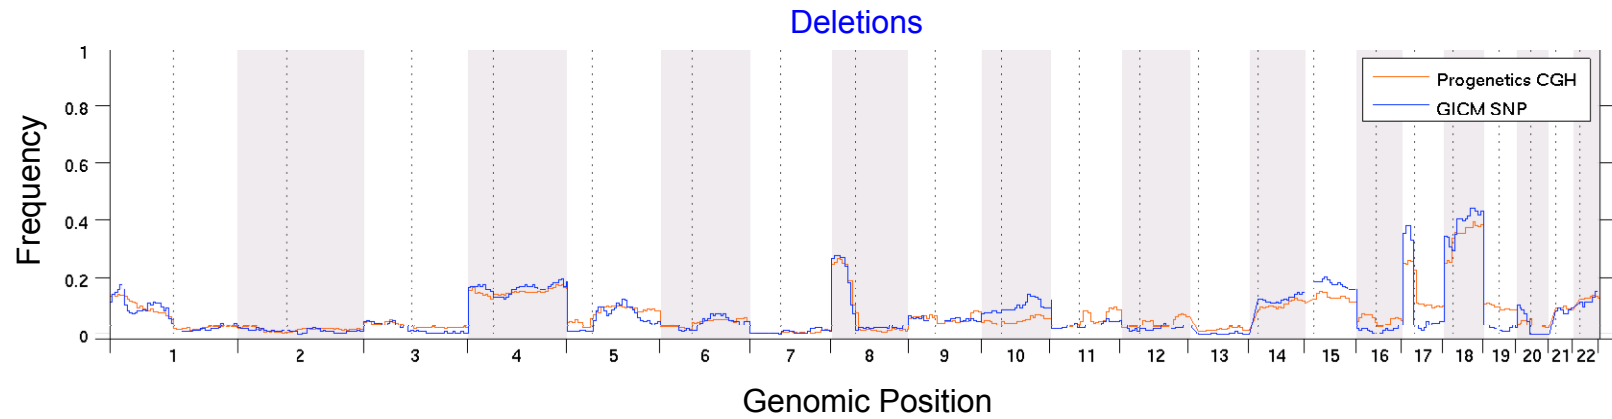

Number of Tumors

GICM n=190  
Progenetix n=998

Figure S5-B

## Gastric Adenocarcinoma

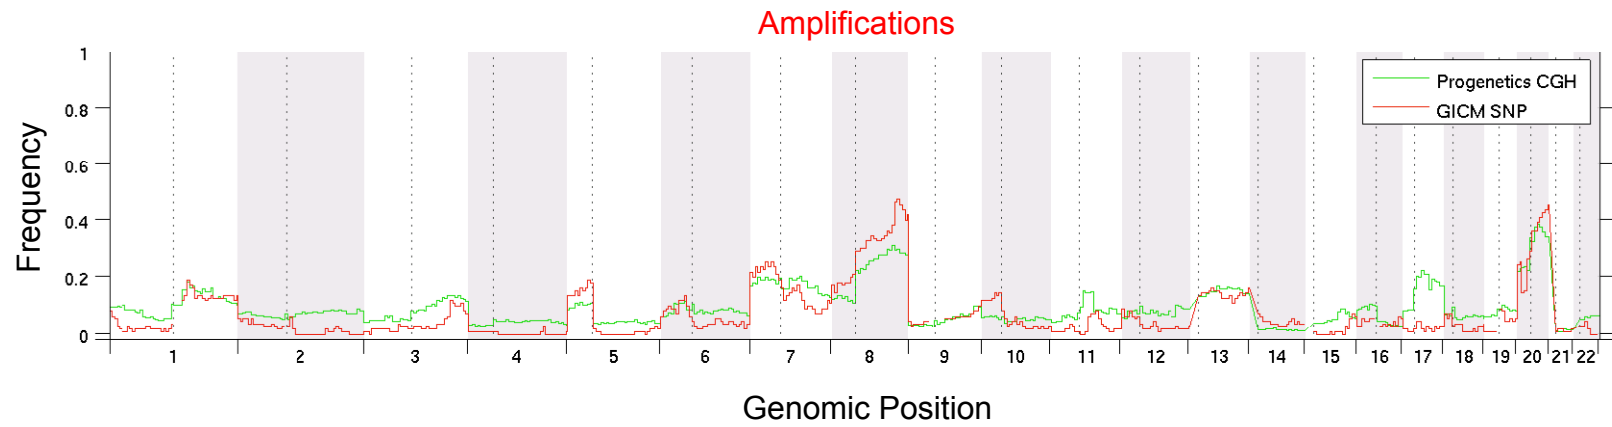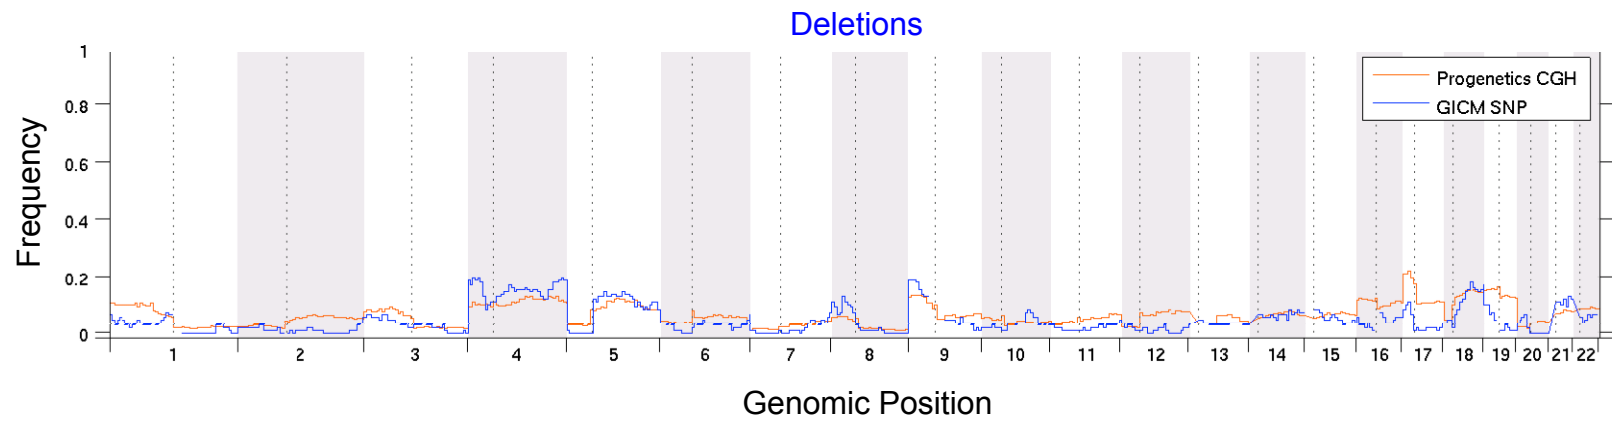

Number of Tumors

GICM n=110  
Progenetix n=741



Figure S5-C

## Esophageal Adenocarcinoma

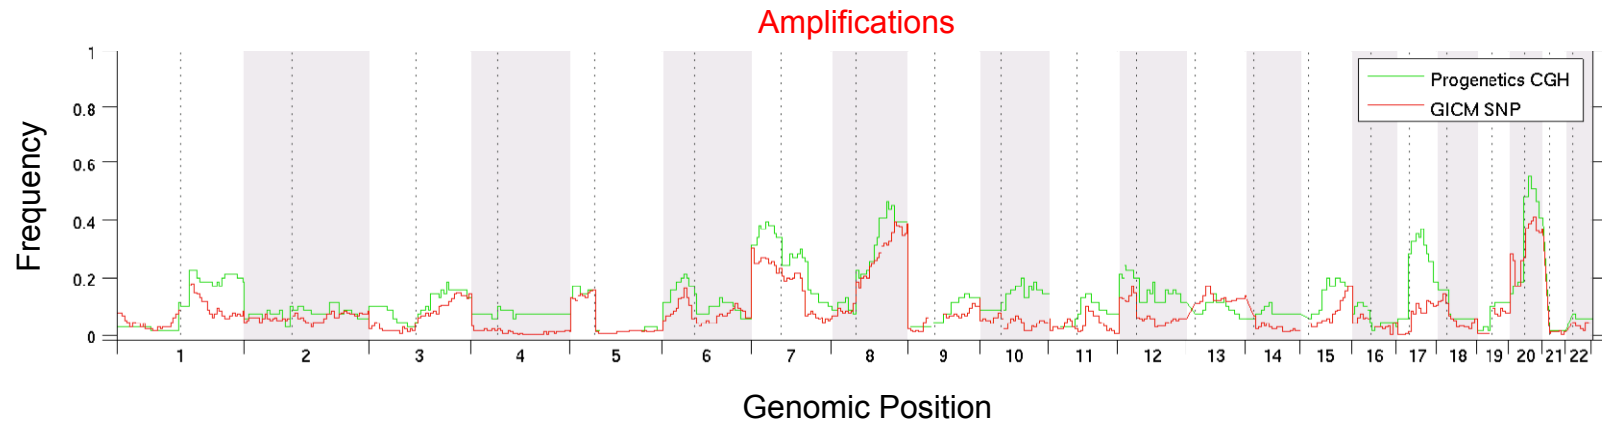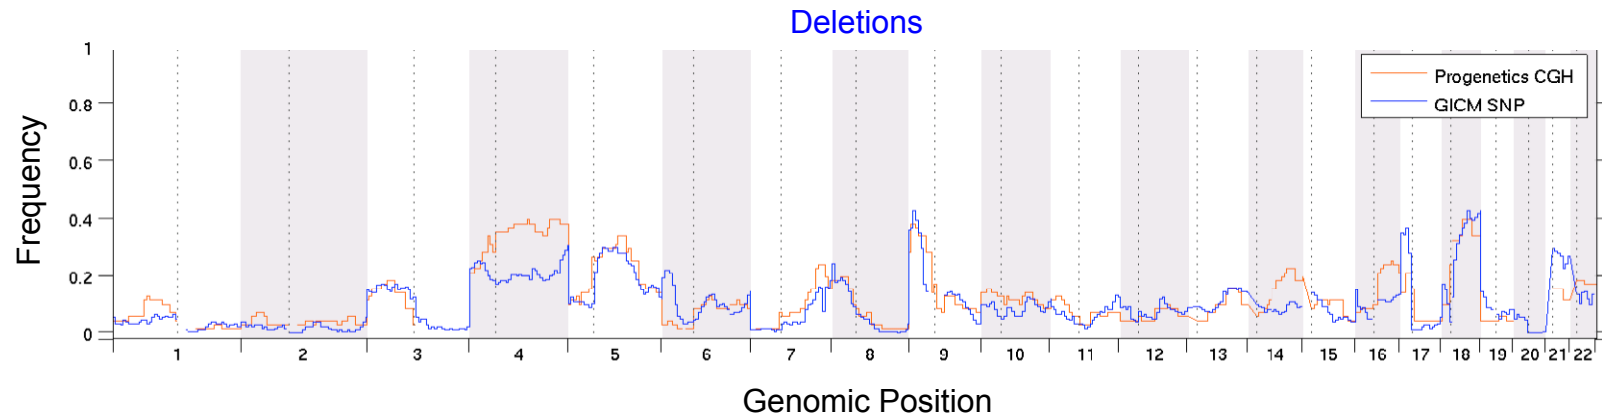

Number of Tumors

GICM n=186  
Progenetix n=71

Figure S6

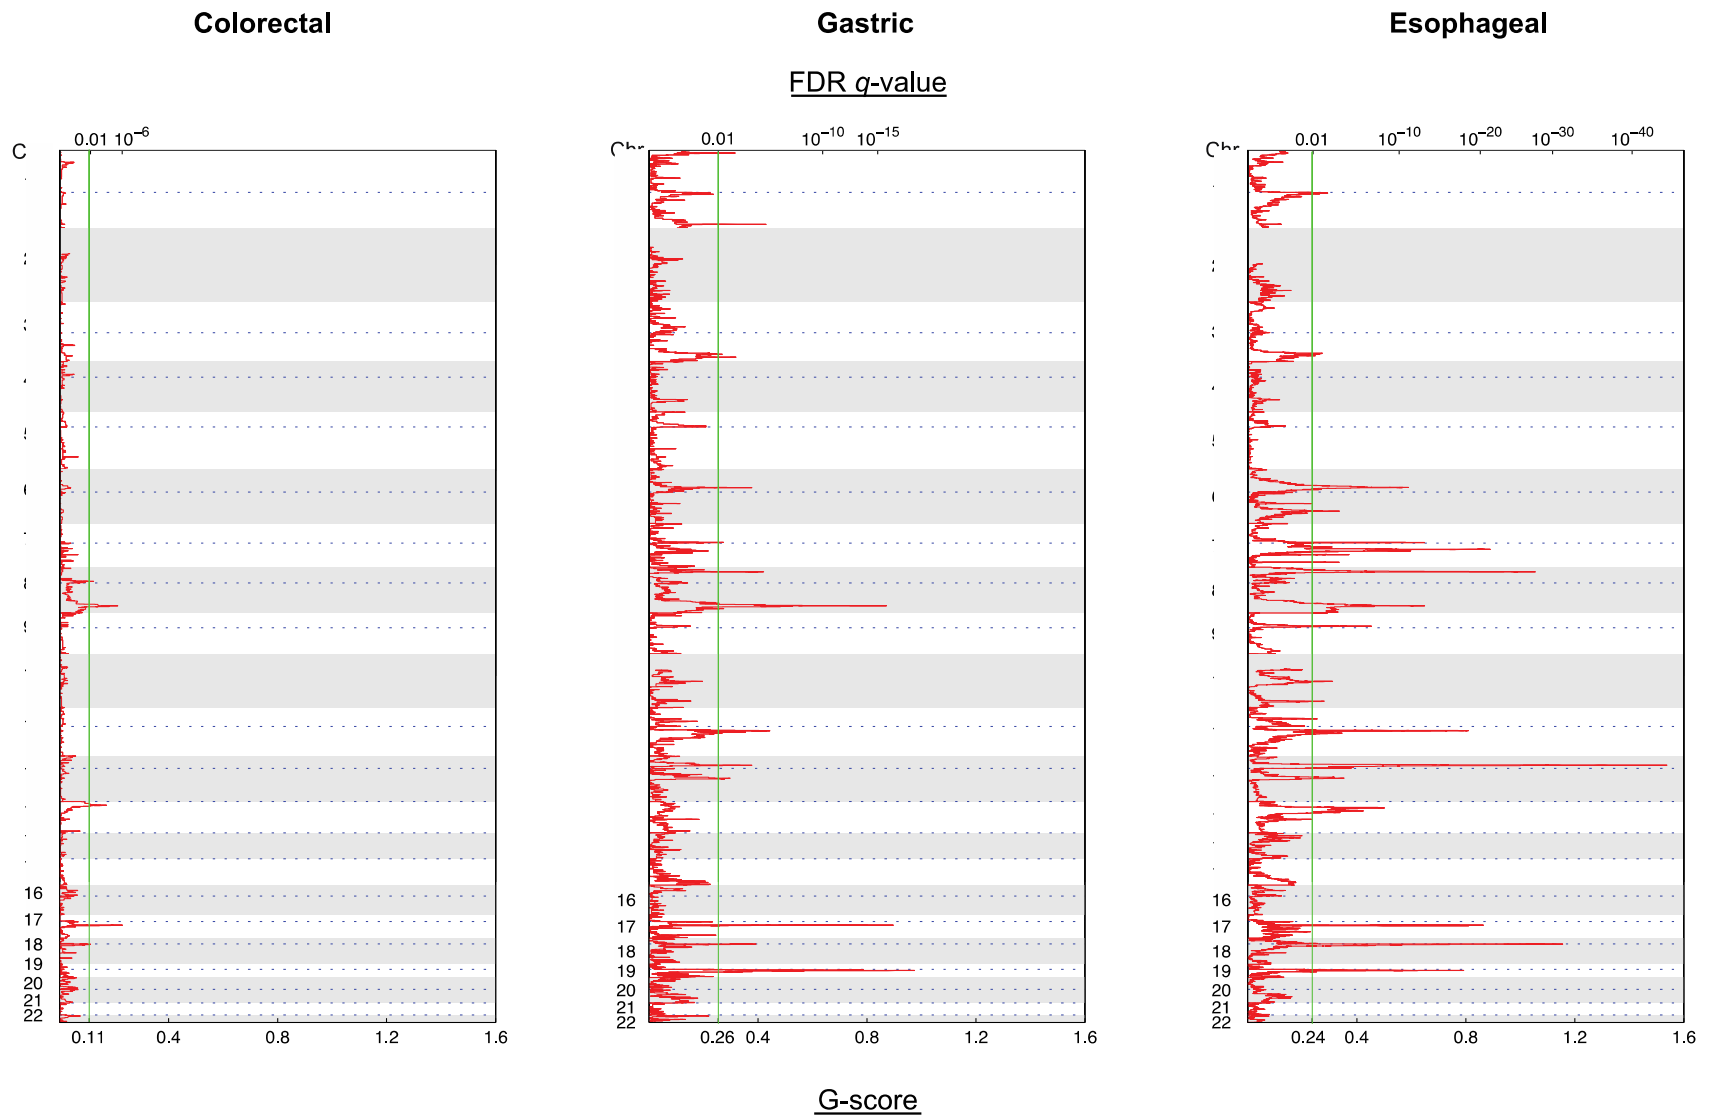

Figure S7

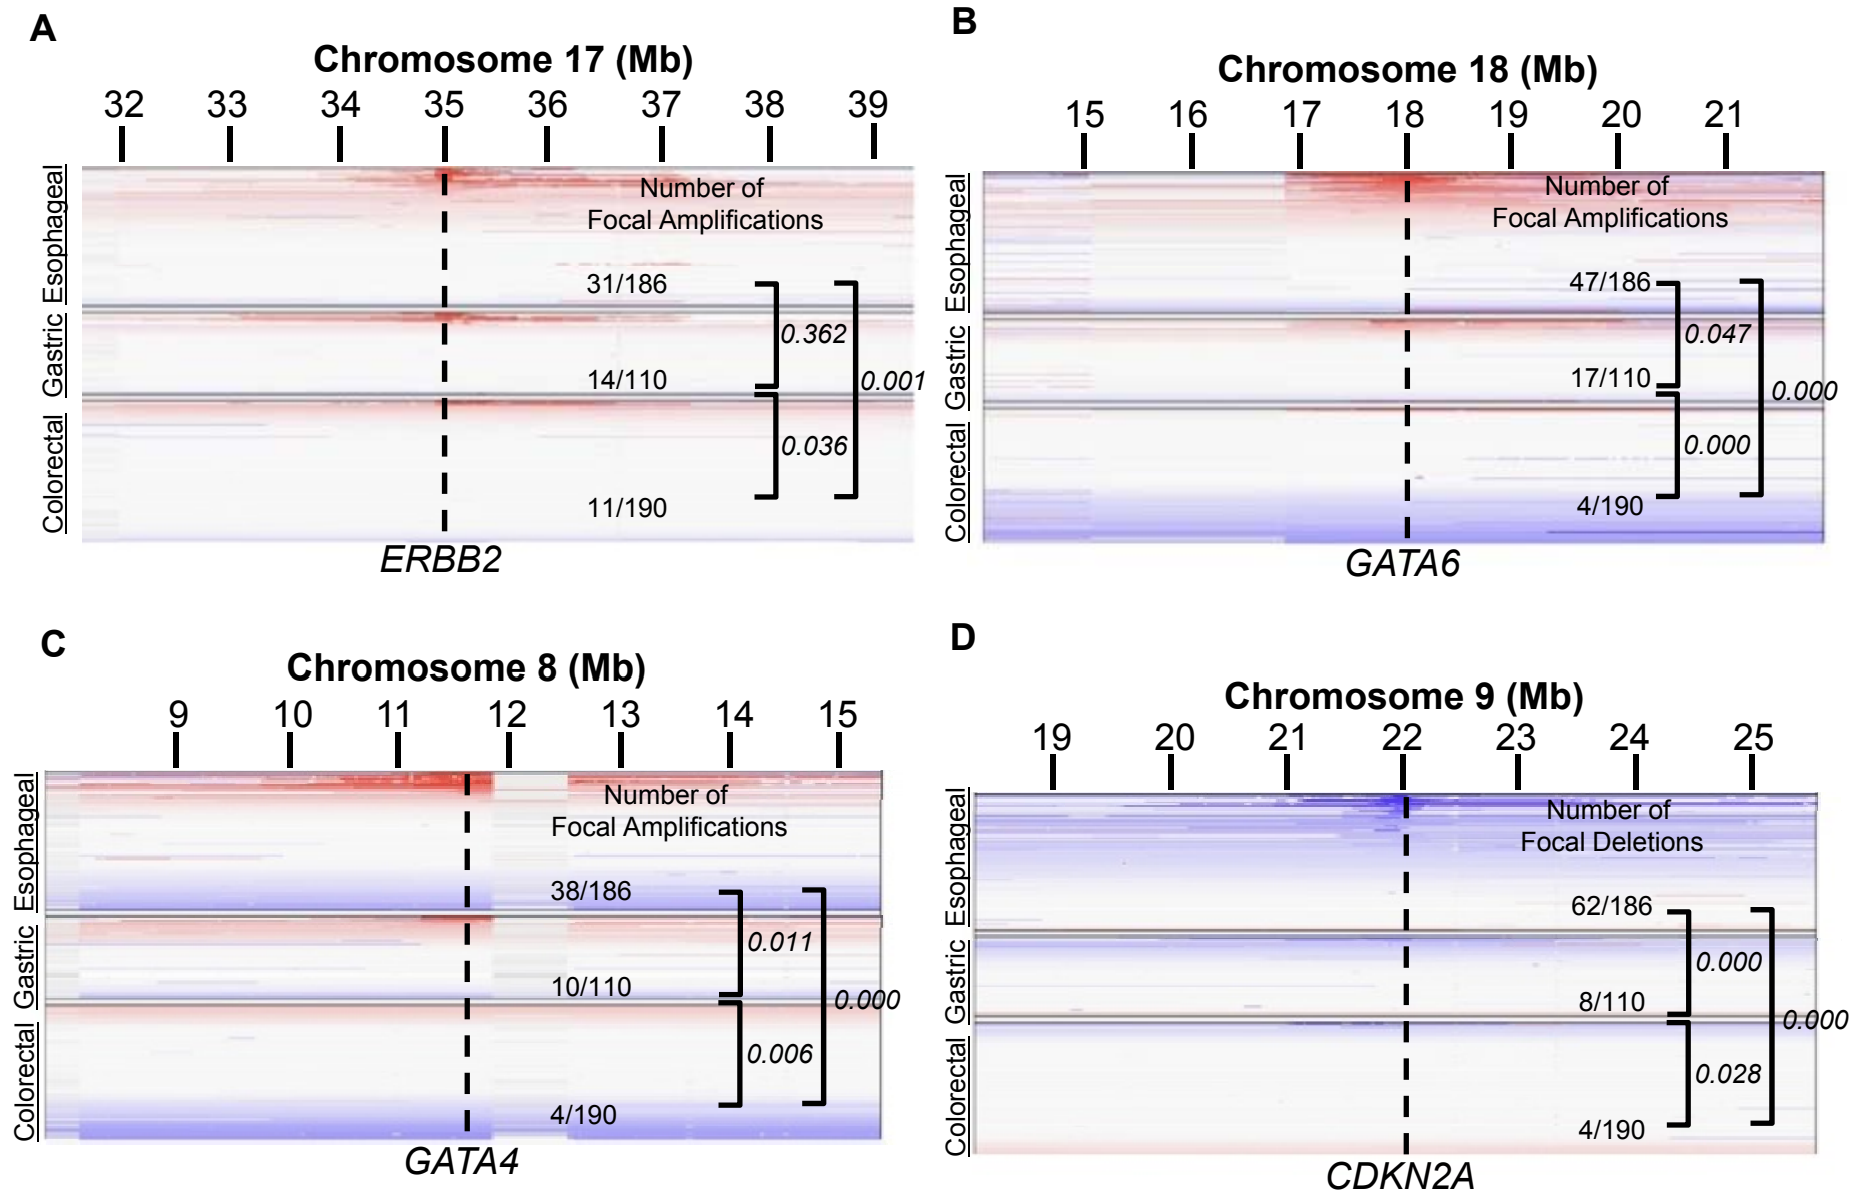

Figure S8

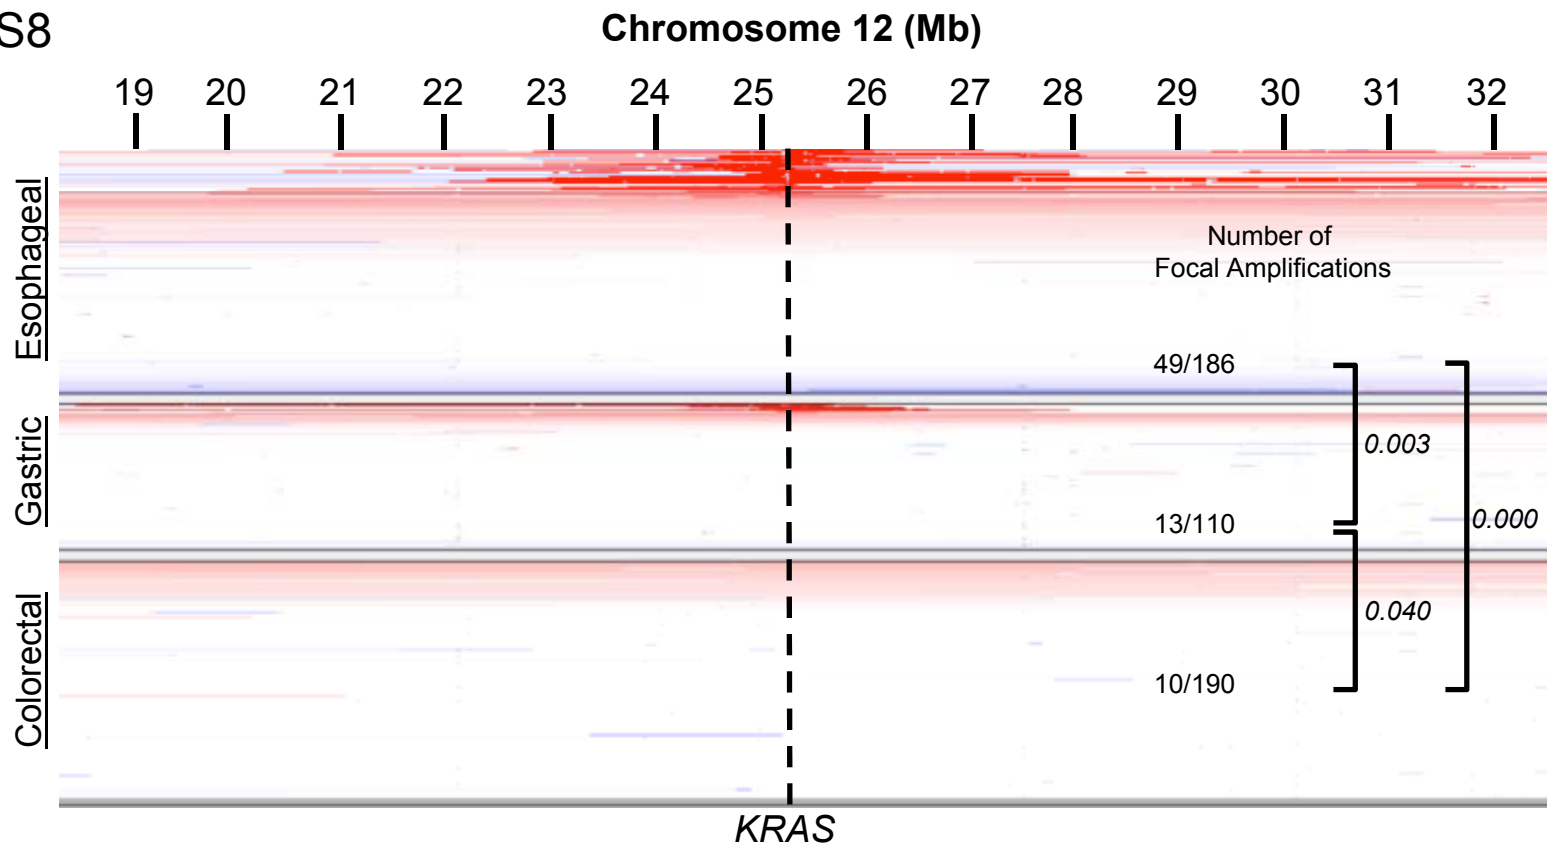

**B**

Percentage of samples with *KRAS* amplification or mutation

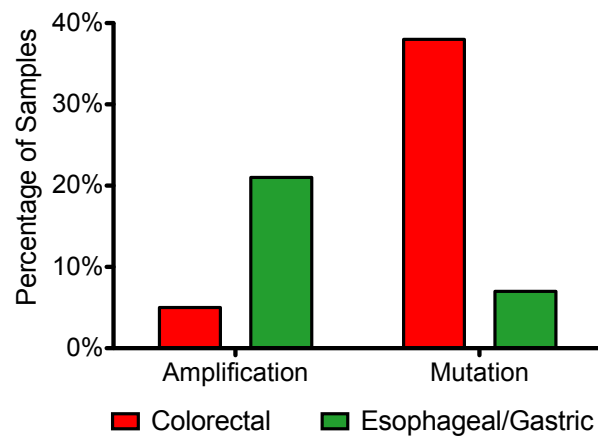

Figure S9

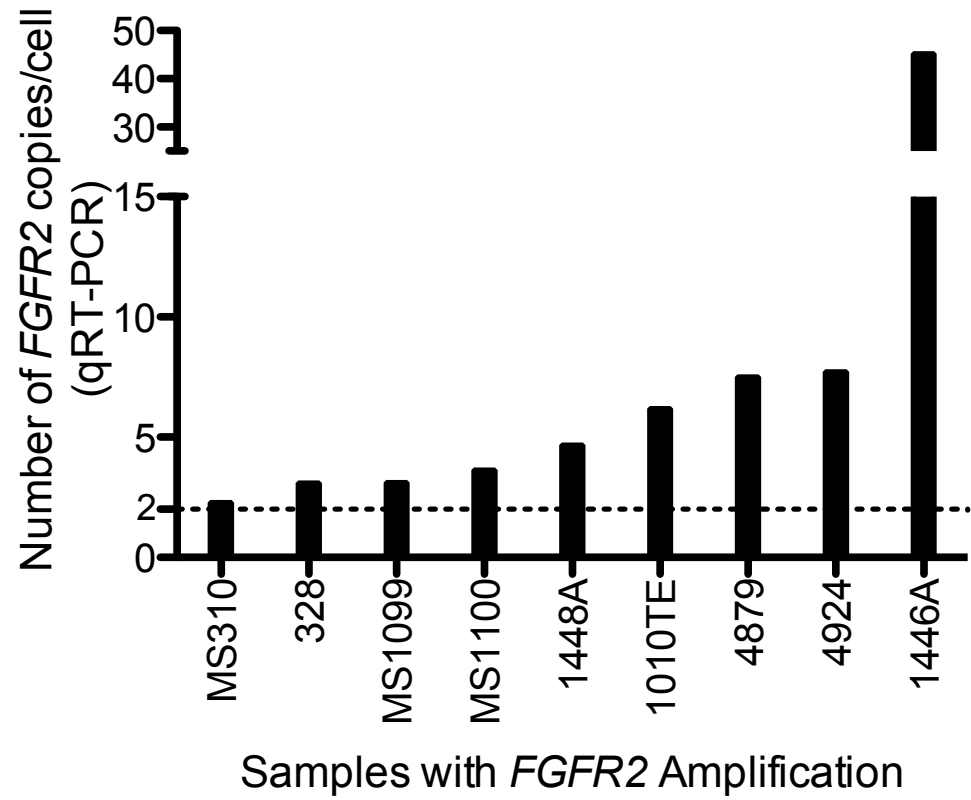

Figure S10

Commonalities across all cancer types

Amplifications

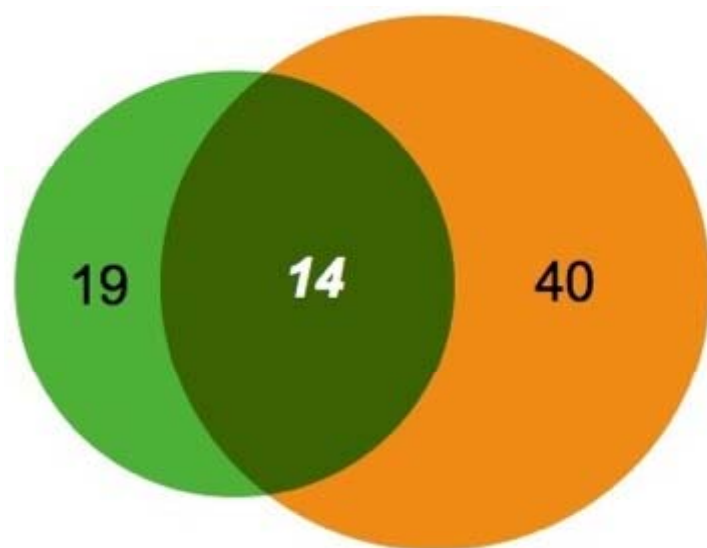

Deletions

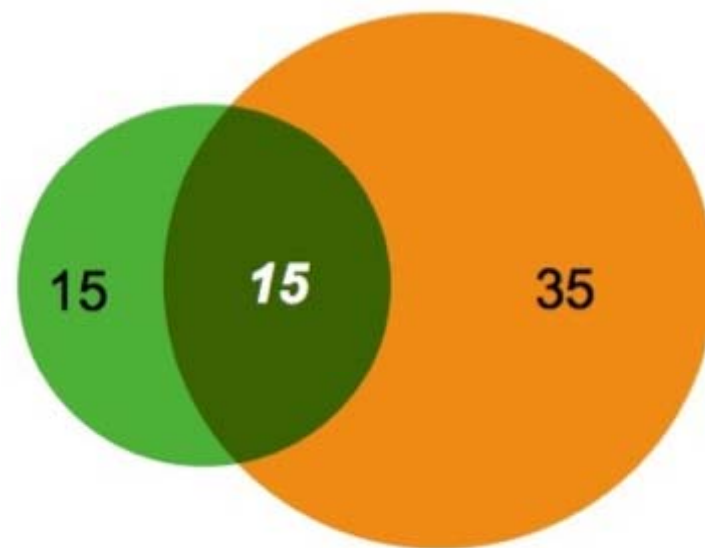

Gut adenocarcinomas   
All other cancers 

Figure S11

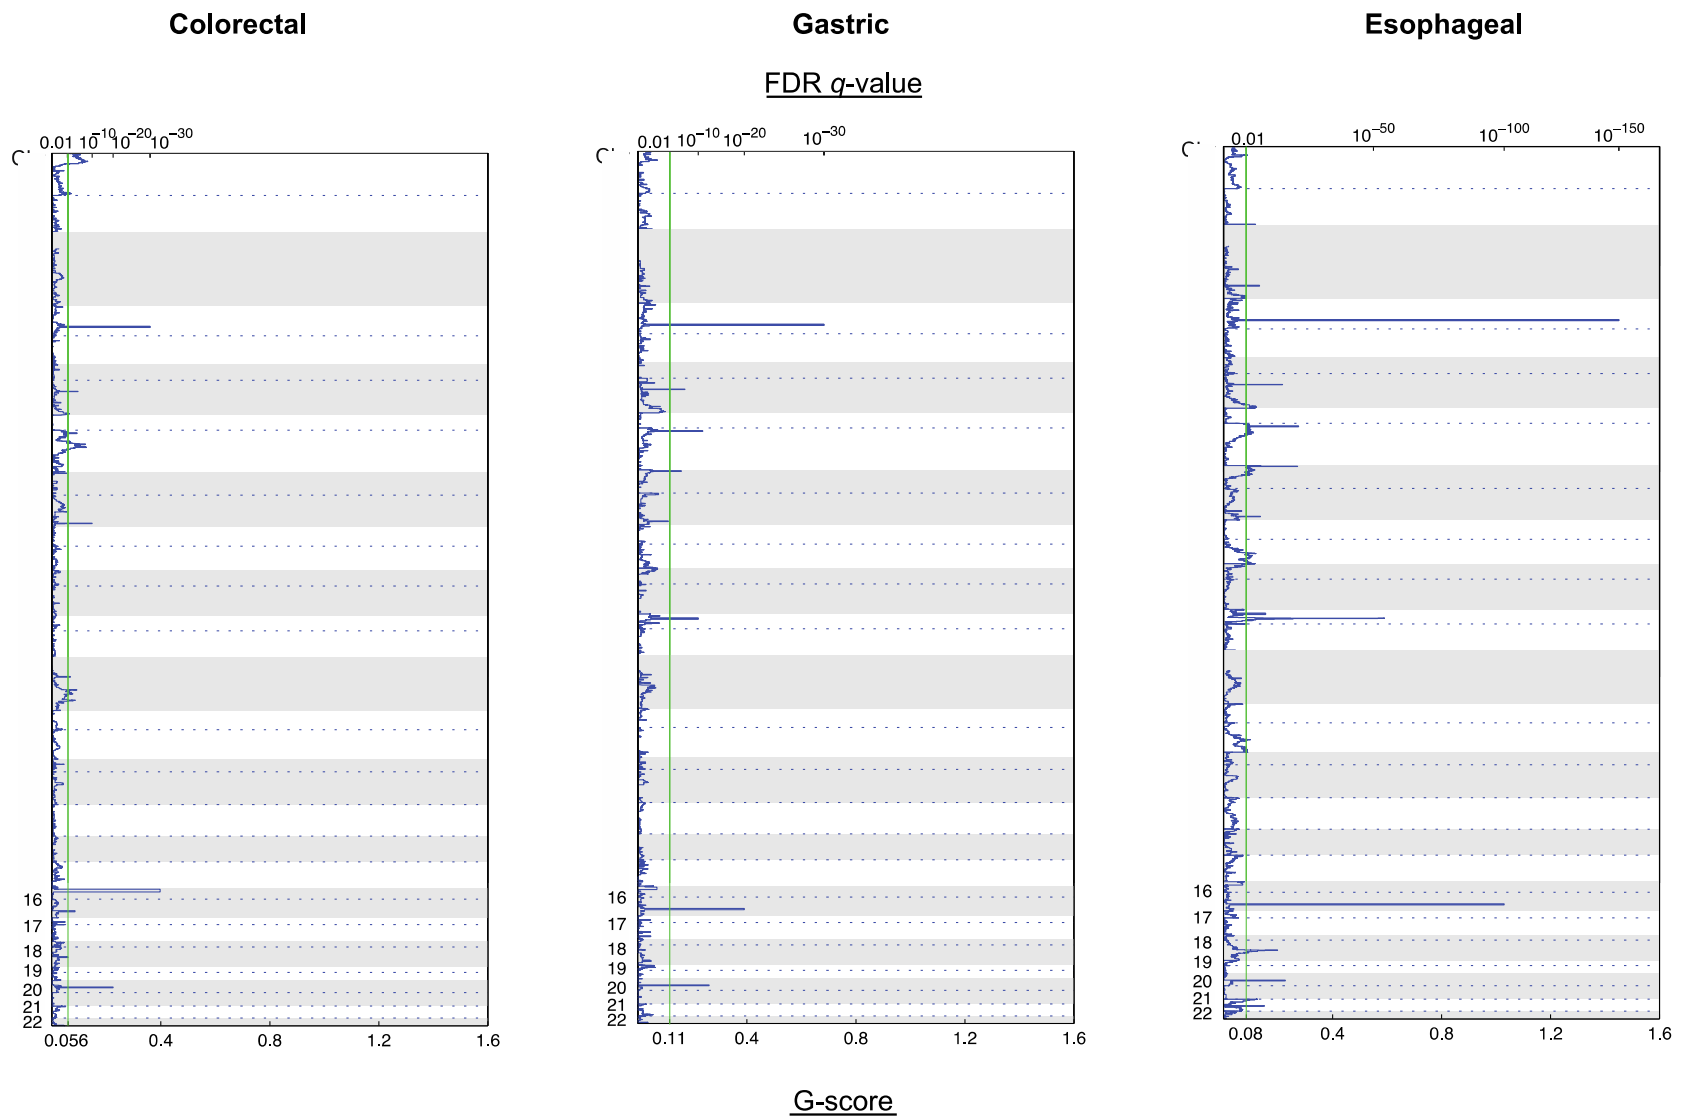

Figure S12

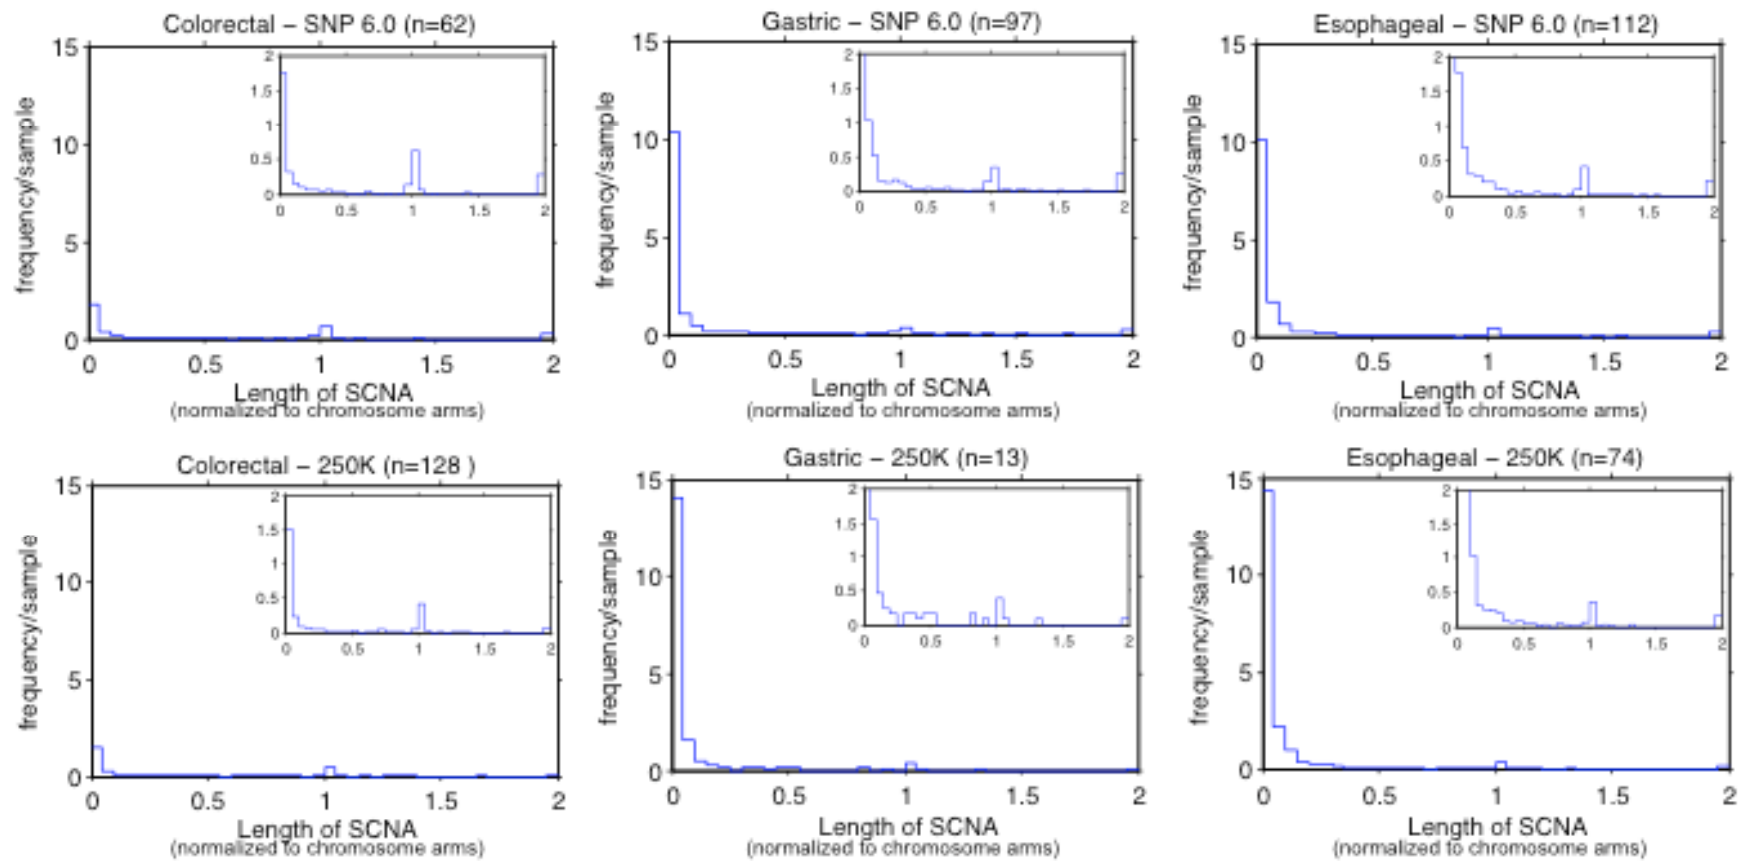



Figure S13

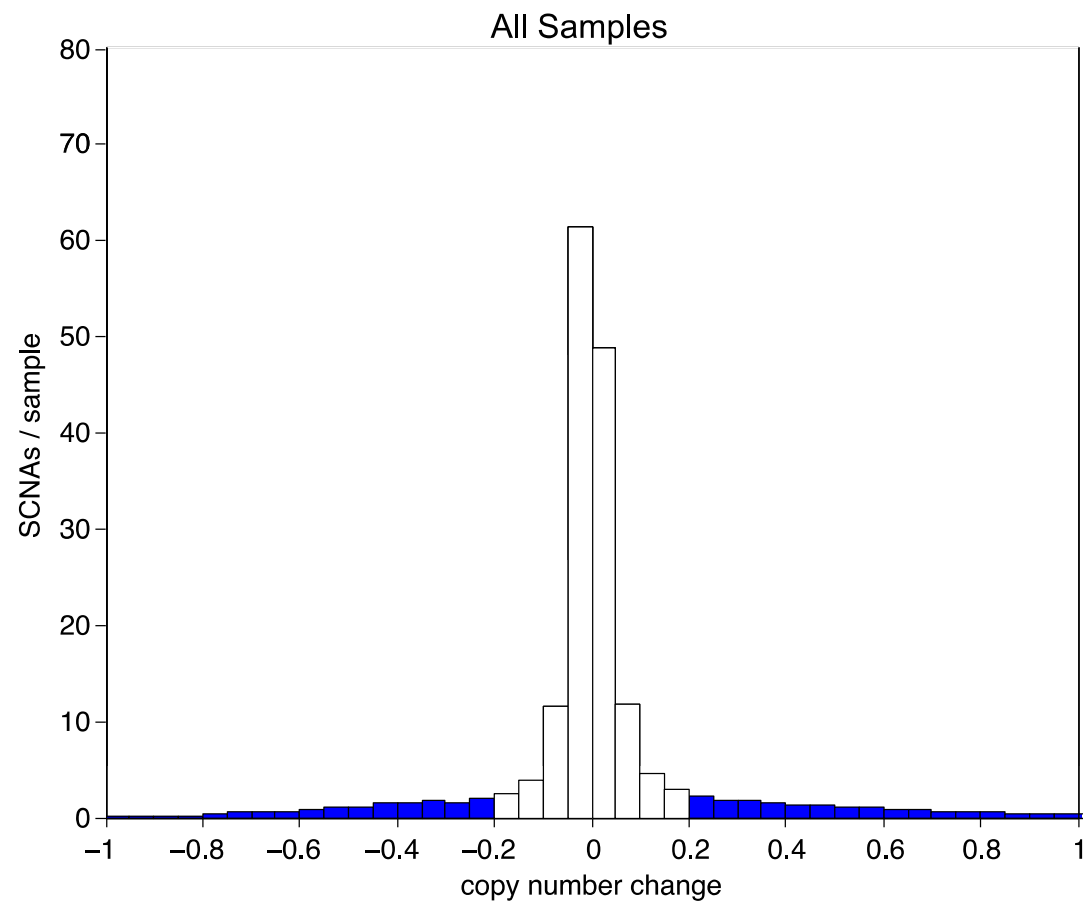

Supplement: 00085472can113893-sup-f1-13_1077k.pdf [file 00085472can113893-sup-f1-13_1077k.pdf]
