# Supplementary material for: Gastrointestinal Adenocarcinomas of the Esophagus, Stomach, and Colon Exhibit Distinct Patterns of Genome Instability and Oncogenesis
Source: Oxford University Press journal article supplement (doi:10.1158/0008-5472.can-11-3893), 2012-07-03
Supplement: 00085472can113893-sup-t1-6_134k.pdf [file 00085472can113893-sup-t1-6_134k.pdf]

# Table S1

| Tumor Type                | Origin of Samples                      | Number of Samples | Type of Array | Method of DNA Extraction | Mode of Validation                        | Notes                                                                                              |
|---------------------------|----------------------------------------|-------------------|---------------|--------------------------|-------------------------------------------|----------------------------------------------------------------------------------------------------|
| Esophageal Adenocarcinoma | University of Pittsburgh, U.S.A.       | 112               | SNP6.0        | Salt precipitation       | >70% tumor content by pathological review | 7q21 amplification frequency in these data was previously reported (Ismail A, et al. 2011)         |
|                           | University of Michigan, U.S.A.         | 74                | 250K Styl     | Phenol Chloroform        | >70% tumor content by pathological review | Frequency of <i>GATA6</i> amplification in these data was previously reported (Lin L, et al. 2012) |
|                           | <b>Total</b>                           | <b>186</b>        |               |                          |                                           |                                                                                                    |
| Gastric Adenocarcinoma    | University of Siena                    | 97                | SNP6.0        | Salt Precipitation       | >80% tumor content by pathological review | Pathological examination excluded these cases as esophageal or GEJ                                 |
|                           | Massachusetts General Hospital, U.S.A. | 9                 | 250K Styl     | Salt Precipitation       | >70% tumor content by pathological review |                                                                                                    |
|                           | University of North Carolina, U.S.A.   | 4                 | 250K Styl     | Salt Precipitation       | >70% tumor content by pathological review |                                                                                                    |
| <b>Total</b>              | <b>110</b>                             |                   |               |                          |                                           |                                                                                                    |
| Colorectal Carcinoma      | Vall d'Hebron Hospital, Barcelona      | 62                | SNP6.0        | Salt Precipitation       | >70% tumor content by pathological review |                                                                                                    |
|                           | Brigham and Women's Hospital, U.S.A.   | 46                | 250K Styl     | Salt precipitation       | >70% tumor content by pathological review | Data described previously (Firestein R, et al. 2008)                                               |
|                           | Genomics Collaborative Incorporated    | 43                | 250K Styl     | Salt precipitation       | >70% tumor content by pathological review | Data described previously (Firestein R, et al. 2008)                                               |
|                           | Massachusetts General Hospital, U.S.A. | 25                | 250K Styl     | Salt precipitation       | >70% tumor content by pathological review | Data described previously (Firestein R, et al. 2008)                                               |
|                           | Vall d'Hebron Hospital, Barcelona      | 9                 | 250K Styl     | Salt precipitation       | >70% tumor content by pathological review | Data described previously (Firestein R, et al. 2008)                                               |
|                           | Brigham and Women's Hospital, U.S.A.   | 5                 | 250K Styl     | Salt Precipitation       | >70% tumor content by pathological review |                                                                                                    |
| <b>Total</b>              | <b>190</b>                             |                   |               |                          |                                           |                                                                                                    |

Table S2-A

### Significant amplifications in colorectal adenocarcinomas

| <b>Cytoband</b> | <b>Residual q-value</b> | <b>Peak Boundaries (Mb)</b> | <b>Number of Genes in Peak</b> | <b>Candidate Target(s)</b> |
|-----------------|-------------------------|-----------------------------|--------------------------------|----------------------------|
| 17q12           | 7.39E-07                | 34.97-35.52                 | 20                             | <i>ERBB2</i>               |
| 8q24.21         | 2.15E-06                | 128.50-128.83               | 2                              | <i>MYC</i>                 |
| 13q12.2         | 5.24E-05                | 27.13-27.33                 | 2                              | <i>CDK8*</i>               |
| 8p12            | 6.09E-03                | 38.26-38.46                 | 3                              | <i>FGFR1</i>               |
| 18q11.2         | 9.21E-03                | 18.52-18.97                 | 2                              | <i>GATA6</i>               |

\* denotes gene is adjacent to peak

Table S2-B

## Significant amplifications in gastric adenocarcinomas

| <b>Cytoband</b> | <b>Residual q-value</b> | <b>Peak Boundaries (Mb)</b> | <b>Number of Genes in Peak</b> | <b>Candidate Target(s)</b>      |
|-----------------|-------------------------|-----------------------------|--------------------------------|---------------------------------|
| 19q12           | 1.16E-18                | 34.95-35.10                 | 1                              | <i>CCNE1</i>                    |
| 17q12           | 5.88E-17                | 34.97-35.24                 | 10                             | <i>ERBB2</i>                    |
| 8q24.21         | 1.19E-16                | 128.51-128.64               | 1                              | <i>MYC</i>                      |
| 1q42.3          | 5.80E-06                | 23.31-23.34                 | 4                              |                                 |
| 8p23.1          | 1.07E-05                | 11.41-11.77                 | 5                              | <i>GATA4</i>                    |
| 18q11.2         | 2.73E-05                | 17.74-18.05                 | 1                              | <i>GATA6</i>                    |
| 11q13.3         | 3.71E-05                | 68.43-70.10                 | 17                             | <i>CCND1, FGF3, FGF4, FGF19</i> |
| 12p12.1         | 4.83E-05                | 25.01-25.78                 | 6                              | <i>KRAS</i>                     |
| 6p21.1          | 5.01E-05                | 43.79-44.01                 | 2                              | <i>VEGFA</i>                    |
| 3q27.1          | 8.33E-04                | 185.71-186.17               | 3                              | <i>EPHB3</i>                    |
| 1p36.22         | 8.79E-04                | 10.54-10.92                 | 2                              |                                 |
| 12q15           | 2.71E-03                | 65.90-69.27                 | 23                             | <i>MDM2, FRS2</i>               |
| 7p11.2          | 5.22E-03                | 54.84-55.28                 | 1                              | <i>EGFR</i>                     |
| 11q13.4         | 5.38E-03                | 73.89-74.04                 | 1                              |                                 |

Table S2-C

### Significant amplifications in esophageal adenocarcinomas

| Cytoband | Residual q-value | Peak Boundaries (Mb) | Number of Genes in Peak | Candidate Target(s)             |
|----------|------------------|----------------------|-------------------------|---------------------------------|
| 12p12.1  | 5.13E-47         | 25.23-25.34          | 3                       | <i>KRAS</i>                     |
| 18q11.2  | 5.10E-30         | 17.95-18.16          | 1                       | <i>GATA6</i>                    |
| 8p23.1   | 2.07E-28         | 11.41-11.71          | 4                       | <i>GATA4</i>                    |
| 19q12    | 1.44E-18         | 34.94-35.10          | 1                       | <i>CCNE1</i>                    |
| 7q21.2   | 1.93E-18         | 92.32-92.50          | 1                       | <i>CDK6*</i>                    |
| 11q13.2  | 5.61E-18         | 68.97-69.49          | 5                       | <i>CCND1, FGF3, FGF4, FGF19</i> |
| 17q12    | 2.09E-16         | 34.97-35.27          | 10                      | <i>ERBB2</i>                    |
| 17q21.2  | 2.95E-14         | 37.02-37.21          | 7                       |                                 |
| 7p11.2   | 2.24E-13         | 54.92-55.40          | 1                       | <i>EGFR</i>                     |
| 8q24.21  | 2.76E-12         | 128.47-128.91        | 5                       | <i>MYC</i>                      |
| 6p21.1   | 8.44E-12         | 43.32-43.46          | 4                       | <i>VEGFA*</i>                   |
| 9p13.3   | 8.51E-08         | 35.47-35.93          | 25                      |                                 |
| 13q13.1  | 3.05E-07         | 32.28-33.33          | 3                       |                                 |
| 7q22.1   | 5.52E-07         | 99.13-99.84          | 32                      |                                 |
| 7q31.2   | 2.20E-05         | 115.92-116.42        | 7                       | <i>MET</i>                      |
| 12q15    | 3.96E-05         | 65.56-68.50          | 20                      | <i>MDM2</i>                     |
| 7q34     | 1.16E-04         | 141.92-142.26        | 4                       | <i>EPHB6</i>                    |
| 6q23.3   | 1.53E-04         | 135.32-135.87        | 5                       | <i>MYB</i>                      |
| 10q22.2  | 3.88E-04         | 75.00-75.80          | 16                      |                                 |
| 1q21.3   | 8.38E-04         | 146.23-152.37        | 167                     | <i>MCL1</i>                     |
| 10q26.12 | 1.47E-03         | 122.75-123.91        | 4                       | <i>FGFR2</i>                    |
| 3q26.2   | 2.14E-03         | 170.20-173.76        | 27                      | <i>PRKCι</i>                    |
| 18q11.2  | 2.21E-03         | 21.70-22.46          | 4                       |                                 |
| 13q14.11 | 2.38E-03         | 40.27-40.83          | 10                      |                                 |
| 11p14.2  | 5.25E-03         | 27.04-27.57          | 5                       |                                 |

\* denotes gene is adjacent to peak

Table S3

**Significant amplifications  
(comparing gut adenocarcinomas to all other cancer types)**

| Restricted to Gut Adenocarcinomas |                  | Restricted to All Other Cancers |                  | Restricted to All Other Cancers |                  | Observed in All Cancers |                  |
|-----------------------------------|------------------|---------------------------------|------------------|---------------------------------|------------------|-------------------------|------------------|
| <i>Peak</i>                       | <i>Candidate</i> | <i>Peak</i>                     | <i>Candidate</i> | <i>Peak</i>                     | <i>Candidate</i> | <i>Peak</i>             | <i>Candidate</i> |
| 1p36.22                           |                  | 1p32.1                          | <i>JUN</i>       | 8q24.3                          |                  | 1q21.2                  | <i>MCL1</i>      |
| 1q42.3                            |                  | 1p34.2                          |                  | 12q14.1                         | <i>CDK4</i>      | 6p21.1                  | <i>VEGFA</i>     |
| 3q26.31                           |                  | 1p36.33                         |                  | 12q14.2                         |                  | 6q23.3                  | <i>MYB</i>       |
| 3q27.1                            | <i>EPHB3</i>     | 1q23.2                          |                  | 12q14.3                         |                  | 7p11.2                  | <i>EGFR</i>      |
| 7q21.2                            | <i>CDK6</i>      | 1q24.3                          |                  | 12q21.1                         |                  | 8p12                    | <i>FGFR1</i>     |
| 7q22.1                            |                  | 1q32.1                          |                  | 12q21.2                         |                  | 8q24.21                 | <i>MYC</i>       |
| 7q31.2                            | <i>MET</i>       | 1q44                            | <i>AKT3</i>      | 12q21.31                        |                  | 11q13.2                 | <i>CCND1</i>     |
| 7q34                              | <i>EPHB6</i>     | 2p24.3                          | <i>MYCN</i>      | 12q21.33                        |                  | 11q14.1                 |                  |
| 8p23.1                            | <i>GATA4</i>     | 3q26.2                          |                  | 12q23.1                         |                  | 12p12.1                 | <i>KRAS</i>      |
| 9p13.3                            |                  | 3q26.33                         | <i>SOX2</i>      | 13q34                           |                  | 12q15                   | <i>MDM2</i>      |
| 10q22.2                           |                  | 5p13.2                          |                  | 14q13.3                         |                  | 15q26.1                 | <i>IGF1R</i>     |
| 10q26.12                          | <i>FGFR2</i>     | 5p15.2                          |                  | 17q11.2                         |                  | 17q12                   | <i>ERBB2</i>     |
| 11p14.2                           |                  | 5p15.33                         | <i>TERT</i>      | 17q21.33                        |                  | 19q12                   | <i>CCNE1</i>     |
| 13q13.1                           |                  | 5q35.3                          |                  | 17q23.1                         |                  | 20q13.2                 |                  |
| 13q14.11                          |                  | 6q21                            |                  | 17q24.2                         |                  |                         |                  |
| 13q22.1                           |                  | 8p11.21                         |                  | 17q25.1                         | <i>CDK3</i>      |                         |                  |
| 17q21.2                           |                  | 8p12                            |                  | 19q13.12                        |                  |                         |                  |
| 17q24.3                           |                  | 8q21.13                         |                  | 20q11.22                        |                  |                         |                  |
| 18q11.2                           | <i>GATA6</i>     | 8q22.3                          |                  | 20q13.33                        | <i>MYT1</i>      |                         |                  |
|                                   |                  | 8q23.3                          |                  | 22q11.21                        | <i>CRKL</i>      |                         |                  |

Table S4-A

## Significant deletions in colorectal adenocarcinomas

| Cytoband | Residual q-value | Peak Boundaries (Mb) | Number of Genes in |      | Candidate Target(s) |
|----------|------------------|----------------------|--------------------|------|---------------------|
|          |                  |                      | Peak               | Peak |                     |
| 16p13.3  | 9.23E-50         | 5.06-7.71            | 2                  |      | <i>A2BP1</i>        |
| 3p14.2   | 1.32E-43         | 58.98-61.52          | 1                  |      | <i>FHIT</i>         |
| 20p12.1  | 9.34E-22         | 14.21-15.99          | 2                  |      | <i>MACROD2</i>      |
| 6q26     | 4.22E-11         | 161.61-163.13        | 1                  |      | <i>PARK2</i>        |
| 1p36.11  | 2.95E-09         | 18.58-29.38          | 180                |      | <i>ARID1A</i>       |
| 4q22.1   | 1.77E-06         | 91.37-93.49          | 2                  |      | <i>FAM190A</i>      |
| 5q22.2   | 1.77E-06         | 110.88-113.74        | 12                 |      | <i>APC</i>          |
| 5q21.1   | 6.25E-06         | 100.16-102.24        | 4                  |      |                     |
| 5q11.2   | 2.30E-05         | 58.18-59.84          | 3                  |      | <i>PDE4D</i>        |
| 16q23.1  | 2.60E-05         | 76.69-78.21          | 2                  |      | <i>WWOX</i>         |
| 10q23.31 | 8.67E-05         | 89.57-90.10          | 2                  |      | <i>PTEN</i>         |
| 10q25.2  | 2.54E-04         | 114.15-115.82        | 11                 |      | <i>CASP7</i>        |
| 1p13.2   | 4.18E-04         | 112.32-116.32        | 35                 |      |                     |
| 10q11.23 | 1.42E-03         | 52.31-53.77          | 5                  |      |                     |
| 4q35.1   | 2.51E-03         | 179.06-189.20        | 39                 |      | <i>CASP3</i>        |
| 18q21.2  | 6.59E-03         | 46.17-48.13          | 6                  |      | <i>SMAD4</i>        |

Table S4-B

## Significant deletions in esophageal adenocarcinomas

| Cytoband | Residual q-value | Peak Boundaries (Mb) | Number of Genes in |                     |
|----------|------------------|----------------------|--------------------|---------------------|
|          |                  |                      | Peak               | Candidate Target(s) |
| 3p14.2   | 9.51E-211        | 58.96-61.52          | 2                  | <i>FHIT</i>         |
| 16q23.1  | 5.07E-129        | 76.69-78.21          | 3                  | <i>WWOX</i>         |
| 9p21.3   | 6.40E-59         | 21.85-22.01          | 3                  | <i>CDKN2A</i>       |
| 5q11.2   | 1.48E-18         | 58.30-59.83          | 3                  | <i>PDE4D</i>        |
| 6p25.3   | 3.42E-18         | 1.54-2.57            | 2                  |                     |
| 20p12.1  | 2.99E-14         | 14.21-15.99          | 2                  | <i>MACROD2</i>      |
| 4q22.1   | 2.57E-13         | 91.37-93.49          | 2                  | <i>FAM190A</i>      |
| 18q21.2  | 1.24E-09         | 46.77-46.97          | 1                  | <i>SMAD4</i>        |
| 21q22.12 | 7.38E-07         | 35.03-35.35          | 2                  | <i>RUNX1</i>        |
| 9p24.1   | 9.14E-07         | 7.78-12.71           | 3                  | <i>PTPRD</i>        |
| 6q26     | 1.05E-05         | 161.61-163.13        | 2                  | <i>PARK2</i>        |
| 2q33.2   | 2.43E-05         | 204.53-206.27        | 1                  |                     |
| 21q11.2  | 6.12E-05         | 1.00-16.26           | 17                 |                     |
| 1q44     | 1.49E-04         | 243.92-244.78        | 1                  |                     |
| 8p23.3   | 5.68E-04         | 1.00-1.45            | 6                  |                     |
| 7q32.1   | 8.77E-04         | 123.45-142.24        | 145                |                     |
| 7q36.3   | 2.02E-03         | 147.74-158.82        | 95                 |                     |
| 1p36.11  | 3.87E-03         | 25.64-31.02          | 89                 | <i>ARID1A</i>       |
| 4q35.1   | 4.51E-03         | 179.06-185.55        | 14                 | <i>CASP3</i>        |
| 11q22.3  | 6.00E-03         | 105.46-112.34        | 50                 | <i>ATM</i>          |
| 11q25    | 8.17E-03         | 120.54-134.45        | 111                |                     |

Table S4-C

## Significant deletions in gastric adenocarcinomas

| <b>Cytoband</b> | <b>Residual q-value</b> | <b>Peak Boundaries<br/>(Mb)</b> | <b>Number of Genes<br/>in Peak</b> | <b>Candidate Target(s)</b> |
|-----------------|-------------------------|---------------------------------|------------------------------------|----------------------------|
| 3p14.2          | 5.28E-60                | 58.98-61.52                     | 1                                  | <i>FHIT</i>                |
| 16q23.1         | 2.16E-26                | 76.69-78.21                     | 2                                  | <i>WWOX</i>                |
| 20p12.1         | 2.31E-14                | 14.21-15.9                      | 2                                  | <i>MACROD2</i>             |
| 5q11.2          | 2.26E-12                | 58.30-59.84                     | 3                                  | <i>PDE4D</i>               |
| 9p24.1          | 6.95E-11                | 7.78-12.71                      | 3                                  | <i>PTPRD</i>               |
| 4q22.1          | 1.36E-07                | 91.37-93.49                     | 2                                  | <i>FAM190A</i>             |
| 6p25.3          | 1.44E-06                | 1.54-2.57                       | 2                                  |                            |
| 6q26            | 2.20E-03                | 161.61-163.13                   | 1                                  | <i>PARK2</i>               |

Table S5

**Significant deletions  
(comparing gut adenocarcinomas to all other cancer types)**

| Restricted to Gut Adenocarcinomas |                  | Restricted to All Other Cancers |                  | Restricted to All Other Cancers |                  | Observed in All Cancers |                  |
|-----------------------------------|------------------|---------------------------------|------------------|---------------------------------|------------------|-------------------------|------------------|
| <i>Peak</i>                       | <i>Candidate</i> | <i>Peak</i>                     | <i>Candidate</i> | <i>Peak</i>                     | <i>Candidate</i> | <i>Peak</i>             | <i>Candidate</i> |
| 1p13.2                            |                  | 1p13.3                          |                  | 11q25                           |                  | 3p14.2                  | <i>FHIT</i>      |
| 1p36.11                           |                  | 1p36.31                         |                  | 12p13.2                         |                  | 4q22.1                  | <i>FAM190A</i>   |
| 1q44                              |                  | 1q42.3                          |                  | 12q24.33                        |                  | 4q35.2                  | <i>CASP3</i>     |
| 2q33.2                            |                  | 2p25.3                          |                  | 13q12.11                        |                  | 5q11.2                  | <i>PDE4D</i>     |
| 3p26.2                            |                  | 2q22.1                          |                  | 13q14.11                        |                  | 5q22.2                  | <i>APC</i>       |
| 4q35.1                            |                  | 2q37.1                          |                  | 13q14.2                         | <i>RB1</i>       | 6q26                    | <i>PARK2</i>     |
| 5q15                              |                  | 2q37.3                          |                  | 15q11.2                         |                  | 7q36.3                  | <i>PTPRN2</i>    |
| 6p25.3                            |                  | 3p26.3                          |                  | 15q15.1                         |                  | 9p21.3                  | <i>CDKN2A</i>    |
| 8p23.3                            |                  | 6q16.1                          |                  | 16p11.2                         |                  | 9p24.1                  | <i>PTPRD</i>     |
| 10q11.23                          |                  | 7q34                            |                  | 16q24.3                         |                  | 10q23.31                | <i>PTEN</i>      |
| 12q21.2                           |                  | 8p21.2                          |                  | 17p13.1                         | <i>TP53</i>      | 11q23.2                 | <i>ATM</i>       |
| 17p12                             |                  | 8p23.2                          | <i>CSMD1</i>     | 17q11.2                         |                  | 16p13.3                 | <i>A2BP1</i>     |
| 18q21.2                           | <i>SMAD4</i>     | 9p13.2                          | <i>PAX5</i>      | 18q23                           |                  | 16q23.1                 | <i>WWOX</i>      |
| 21q22.12                          | <i>RUNX1</i>     | 9p24.3                          |                  | 19p13.3                         |                  | 20p12.1                 | <i>MACROD2</i>   |
| 21q22.3                           |                  | 10p15.3                         |                  | 19q13.32                        |                  | 21q11.2                 |                  |
|                                   |                  | 10q26.3                         |                  | 20p13                           |                  |                         |                  |
|                                   |                  | 11p15.5                         |                  | 22q11.23                        |                  |                         |                  |
|                                   |                  |                                 |                  | 22q13.31                        |                  |                         |                  |

Table S6-A

## Significant amplifications (across all gut adenocarcinomas) in SNP6 Data

| Cytoband                   | Residual q-value | Peak Boundaries (Mb) | Number of Genes in Peak | Candidate Target(s)<br>(Bold designates therapeutic target) |
|----------------------------|------------------|----------------------|-------------------------|-------------------------------------------------------------|
| <i>Gut Adenocarcinomas</i> |                  |                      |                         |                                                             |
| 12p12.1                    | 9.61E-35         | 25.24-25.34          | 2                       | <i>KRAS</i>                                                 |
| 17q12                      | 9.48E-26         | 35.06-35.16          | 7                       | <b>ERBB2</b>                                                |
| 18q11.2                    | 1.46E-24         | 17.96-18.04          | 1                       | <i>GATA6</i>                                                |
| 8q24.21                    | 1.81E-19         | 128.54-128.84        | 2                       | <i>MYC</i>                                                  |
| 11q13.2                    | 2.99E-18         | 68.98-69.49          | 5                       | <i>CCND1</i>                                                |
| 19q12                      | 2.10E-17         | 35.00-35.04          | 1                       | <i>CCNE1</i>                                                |
| 8p23.1                     | 4.02E-17         | 11.30-11.75          | 7                       | <i>GATA4</i>                                                |
| 7q21.2                     | 7.55E-16         | 91.56-92.48          | 12                      | <b>CDK6</b>                                                 |
| 6p21.1                     | 2.41E-15         | 43.80-43.93          | 1                       | <b>VEGFA</b>                                                |
| 7q34                       | 2.57E-13         | 142.03-142.09        | 1                       | [ <i>PRSS1</i> ]                                            |
| 17q21.2                    | 1.30E-08         | 37.13-37.16          | 1                       | <i>HAP1</i>                                                 |
| 12q15                      | 4.44E-07         | 65.95-68.34          | 19                      | <i>MDM2</i>                                                 |
| 7q22.1                     | 7.58E-07         | 98.44-98.82          | 6                       |                                                             |
| 9p13.3                     | 1.20E-06         | 35.59-35.76          | 13                      |                                                             |
| 17q21.2                    | 4.87E-06         | 36.16-36.24          | 6                       |                                                             |
| 7p11.2                     | 9.45E-06         | 54.72-55.38          | 2                       | <b>EGFR</b>                                                 |
| 10q22.2                    | 1.44E-05         | 75.07-75.45          | 13                      |                                                             |
| 20q13.2                    | 7.81E-05         | 51.62-51.97          | 2                       |                                                             |
| 1q42.3                     | 5.30E-04         | 233.06-233.32        | 1                       | [ <i>TOMM20</i> ]                                           |
| 13q22.1                    | 1.83E-03         | 72.48-73.07          | 2                       | <i>KLF5</i>                                                 |
| 1p36.22                    | 2.41E-03         | 10.60-10.99          | 3                       |                                                             |
| 17q24.3                    | 2.61E-03         | 67.87-67.97          | 1                       | [ <i>SLC39A11</i> ]                                         |
| 10q26.13                   | 3.05E-03         | 122.79-123.82        | 4                       | <b>FGFR2</b>                                                |
| 3q27.1                     | 3.16E-03         | 185.73-186.16        | 3                       | <i>EPHB3</i>                                                |
| 18q11.2                    | 6.31E-03         | 19.91-19.94          | 1                       | <b>TTC39C</b>                                               |
| 8q11.1*                    | 7.78E-03         | 47.52-47.56          | 1                       | [ <i>BEYLA</i> ]                                            |
| 2q21.2*                    | 8.33E-03         | 132.77-132.83        | 1                       | [ <i>NCRNA0016</i> ]                                        |

2

\*unique to SNP6.0

[ ] denotes adjacent to peak

Table S6-B

Significant deletions (across all gut adenocarcinomas) with SNP6 Data

| Cytoband                   | Residual q-value | Peak Boundaries (Mb) | Number of Genes in Peak | Candidate Target(s) |
|----------------------------|------------------|----------------------|-------------------------|---------------------|
| <i>Gut Adenocarcinomas</i> |                  |                      |                         |                     |
| 3p14.2                     | 1.48E-181        | 59.01-61.52          | 1                       | <i>FHIT</i>         |
| 16q23.1                    | 1.19E-99         | 76.69-78.19          | 1                       | <i>WWOX</i>         |
| 9p21.3                     | 3.39E-45         | 21.86-21.99          | 2                       | <i>CDKN2A</i>       |
| 20p12.1                    | 2.62E-44         | 14.25-15.98          | 2                       | <i>MACROD2</i>      |
| 5q11.2                     | 1.51E-40         | 58.30-59.82          | 3                       | <i>PDE4D</i>        |
| 4q22.1                     | 3.88E-38         | 91.37-93.46          | 2                       | <i>FAM190A</i>      |
| 6p25.3                     | 1.32E-25         | 15.54-25.69          | 2                       |                     |
| 7q31.1*                    | 9.08E-25         | 110.51-111.16        | 1                       | <i>LRRN3</i>        |
| 6q26                       | 1.39E-18         | 161.61-163.07        | 1                       | <i>PARK2</i>        |
| 21q22.12                   | 3.54E-09         | 35.03-35.34          | 2                       | <i>RUNX1</i>        |
| 3q26.31*                   | 2.87E-08         | 175.48-178.22        | 1                       | <i>NAALADL2</i>     |
| 16p13.3                    | 2.64E-07         | 50.86-77.04          | 1                       | <i>A2BP1</i>        |
| 18q21.2                    | 3.16E-07         | 46.77-46.96          | 1                       | <i>SMAD4</i>        |
| 1q44                       | 5.95E-07         | 243.93-244.77        | 1                       | <i>SMYD3</i>        |
| 9p24.1                     | 5.51E-06         | 7.79-12.68           | 2                       | <i>PTPRD</i>        |
| 7q36.3                     | 2.67E-05         | 157.06-158.03        | 4                       |                     |
| 2q33.2                     | 4.46E-05         | 204.53-206.27        | 1                       | <i>PARD3B</i>       |
| 4q35.2                     | 2.43E-04         | 183.33-191.27        | 49                      | <i>CASP3</i>        |
| 21q11.2                    | 2.62E-04         | 14.59-15.26          | 2                       |                     |
| 1p36.11                    | 3.05E-04         | 25.77-31.02          | 88                      | <i>ARID1A</i>       |
| 10q23.31                   | 4.25E-04         | 89.30-90.02          | 5                       | <i>PTEN</i>         |
| 8p23.3                     | 1.36E-03         | 1.00-1.70            | 7                       |                     |
| 1p13.1*                    | 3.46E-03         | 103.84-144.10        | 168                     |                     |
| 21q22.3                    | 5.64E-03         | 41.14-46.94          | 98                      |                     |
| 1p33*                      | 7.42E-03         | 48.97-50.29          | 1                       |                     |
| 5q22.2                     | 8.73E-03         | 89.89-121.40         | 92                      | <i>APC</i>          |
| 11q25*                     | 9.46E-03         | 120.56-134.45        | 111                     |                     |

2

\*unique to SNP6.0
