# Supplementary figures and images for: Gastrointestinal Adenocarcinomas of the Esophagus, Stomach, and Colon Exhibit Distinct Patterns of Genome Instability and Oncogenesis
Source: Oxford University Press journal article supplement (doi:10.1158/0008-5472.can-11-3893), 2012-07-03

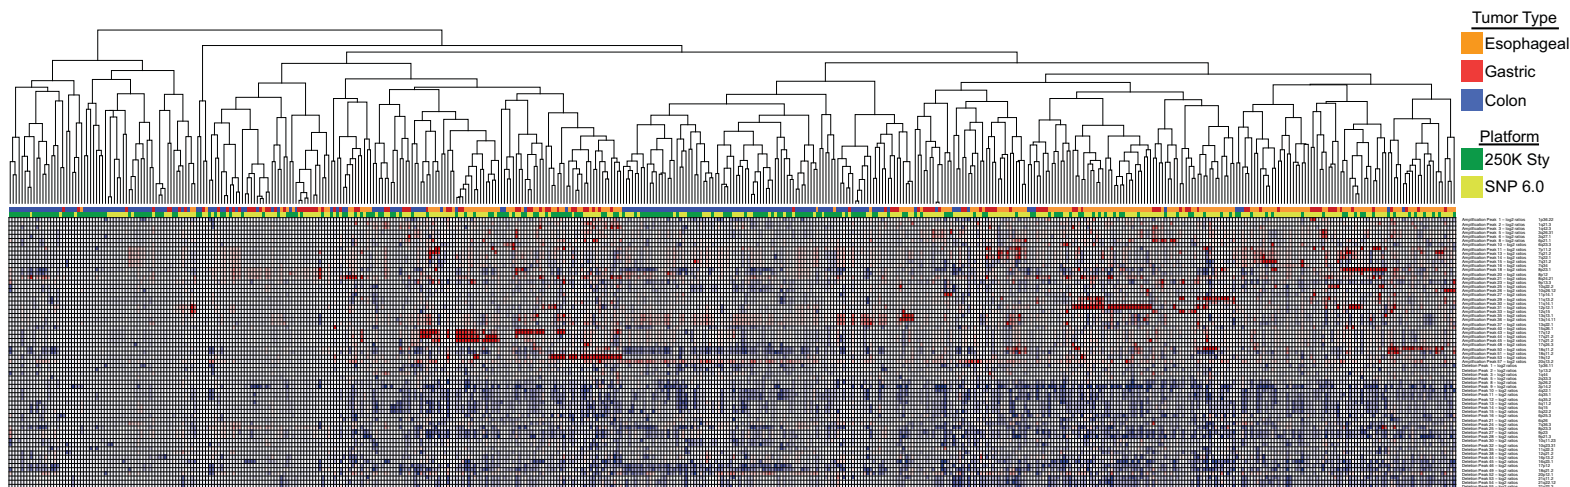

Supplement: 00085472can113893-sup-sf14_340k.pdf [file 00085472can113893-sup-sf14_340k.pdf]
